# Supplementary material for: Objective Evaluation of Earth System Models: PCMDI Metrics Package (PMP) version 3
Source: Copernicus journal article supplement (doi:10.5194/egusphere-2023-2720), 2023-11-24
Supplement: Supplementary file 1 [file egusphere-2023-2720-supplement.pdf]

## *Supplementary material*

### **Objective Evaluation of Earth System Models: PCMDI Metrics Package (PMP) version 3**

Jiwoo Lee<sup>1</sup>, Peter J. Gleckler<sup>1</sup>, Min-Seop Ahn<sup>2,3</sup>, Ana Ordonez<sup>1</sup>, Paul A. Ullrich<sup>1,4</sup>, Kenneth R. Sperber<sup>1,a</sup>, Karl E. Taylor<sup>1</sup>, Yann Y. Planton<sup>5,6</sup>, Eric Guilyardi<sup>7,8</sup>, Paul Durack<sup>1</sup>, Celine Bonfils<sup>1</sup>, Mark D. Zelinka<sup>1</sup>, Li-Wei Chao<sup>1</sup>, Bo Dong<sup>1</sup>, Charles Doutriaux<sup>1</sup>, Chengzhu Zhang<sup>1</sup>, Tom Vo<sup>1</sup>, Jason Boutte<sup>1</sup>, Michael F. Wehner<sup>9</sup>, Angeline G. Pendergrass<sup>10,11</sup>, Daehyun Kim<sup>12</sup>, Zeyu Xue<sup>13</sup>, Andrew T. Wittenberg<sup>14</sup>, and John Krasting<sup>14</sup>

<sup>1</sup> Lawrence Livermore National Laboratory, Livermore, California, USA

<sup>2</sup> NASA Goddard Space Flight Center, Greenbelt, MD, USA

<sup>3</sup> ESSIC, University of Maryland, College Park, MD, USA

<sup>4</sup> University of California, Davis, Davis, California, USA

<sup>5</sup> NOAA Pacific Marine Environmental Laboratory, Seattle, Washington, USA

<sup>6</sup> Monash University, Clayton, Australia

<sup>7</sup> LOCEAN-IPSL, CNRS-IRD-MNHN-Sorbonne Université, Paris, France

<sup>8</sup> National Centre for Atmospheric Science-Climates, University of Reading, Reading, UK

<sup>9</sup> Lawrence Berkeley National Laboratory, Berkeley, California, USA

<sup>10</sup> Department of Earth and Atmospheric Science, Cornell University, Ithaca, New York, USA

<sup>11</sup> National Center for Atmospheric Research, Boulder, Colorado, USA

<sup>12</sup> School of Earth and Environmental Sciences, Seoul National University, Seoul, South Korea

<sup>13</sup> Pacific Northwest National Laboratory, Richland, WA, USA

<sup>14</sup> NOAA Geophysical Fluid Dynamics Laboratory, Princeton, NJ, USA

<sup>a</sup> Retired

Submitted to [Geoscientific Model Development \(GMD\)](#)

(November 2023)

Corresponding to: Jiwoo Lee ([lee1043@llnl.gov](mailto:lee1043@llnl.gov))

7000 East Ave, Livermore, California 94550, USA

33

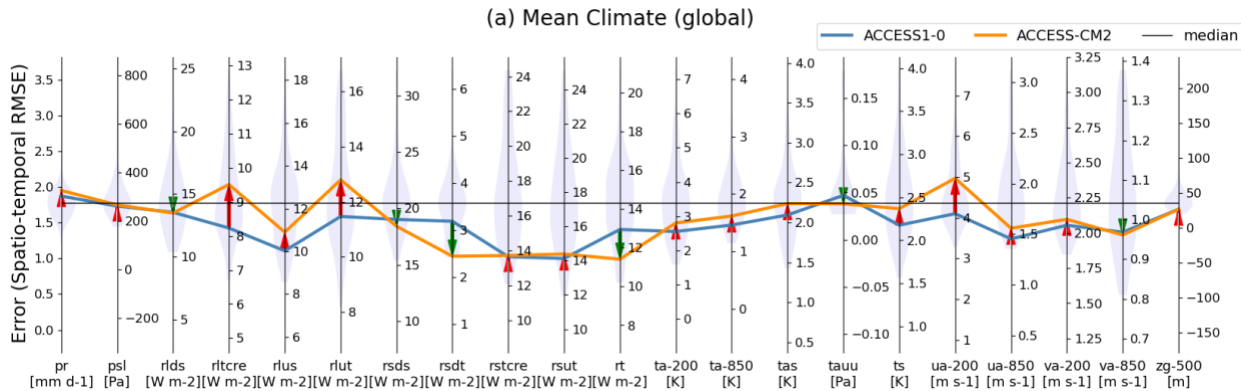

34

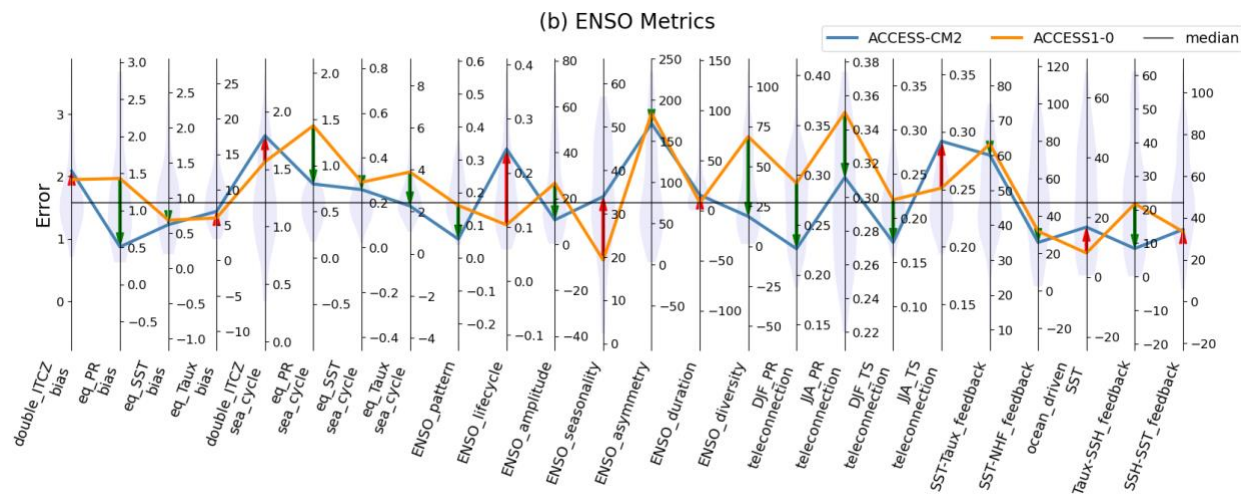

35

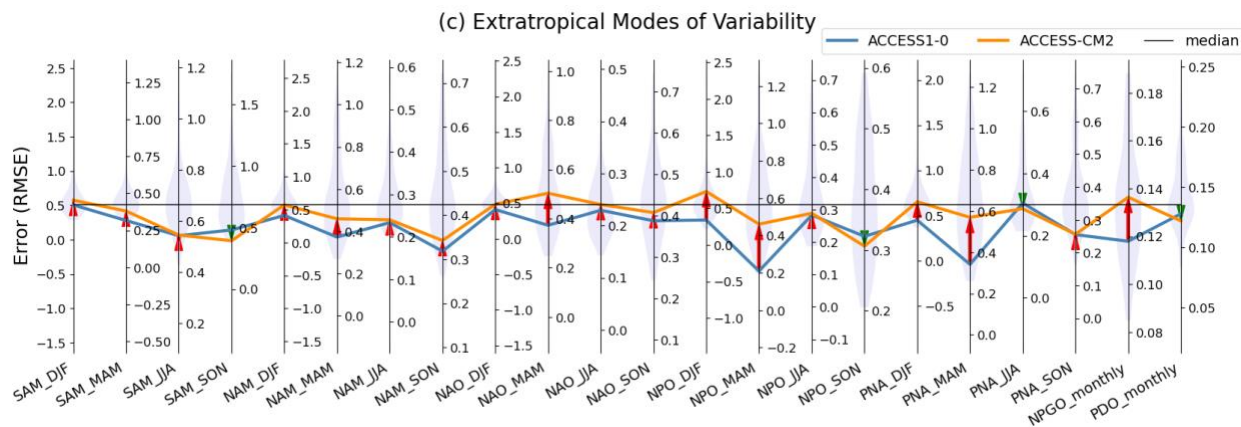

36 **Figure S1.** Parallel Coordinate Plot contrasting performance of two different versions of the  
 37 ACCESS model (i.e., ACCESS-1-0 from CMIP5 and ACCESS-CM2 from CMIP6) in their  
 38 Historical experiment for errors from (a) mean climate, (b) ENSO, and (c) extratropical modes of  
 39 variability. Improvement (degradation) in the later version of the model is highlighted as a  
 40 downward green (upward red) arrow between lines. Middle of each vertical axis is set to the  
 41 median of the group of benchmarking models (i.e., CMIP5 and CMIP6), with the axis range  
 42 stretched to maximum distance to either minimum or maximum from the median for visual  
 43 consistency. The inter-model distributions of model performance are shown as shaded violin  
 44 plots along each vertical axis.

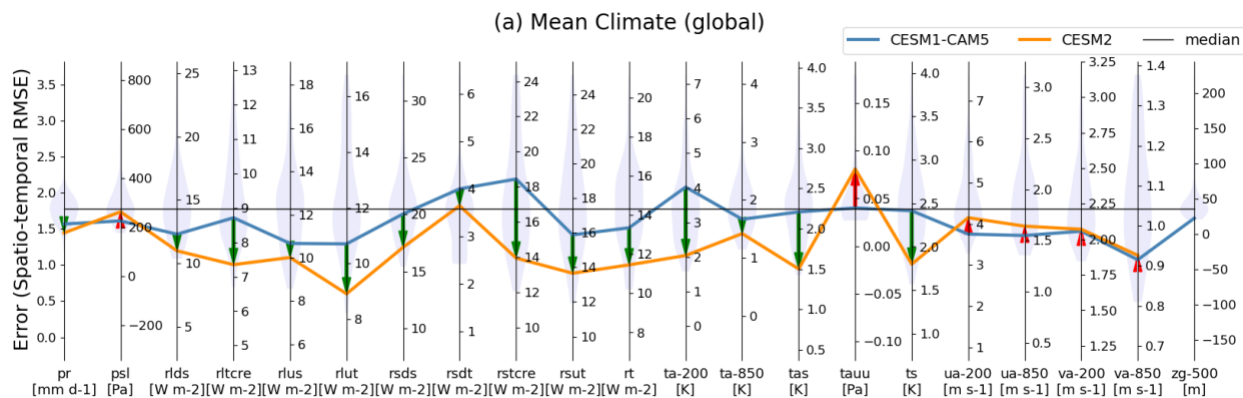

45

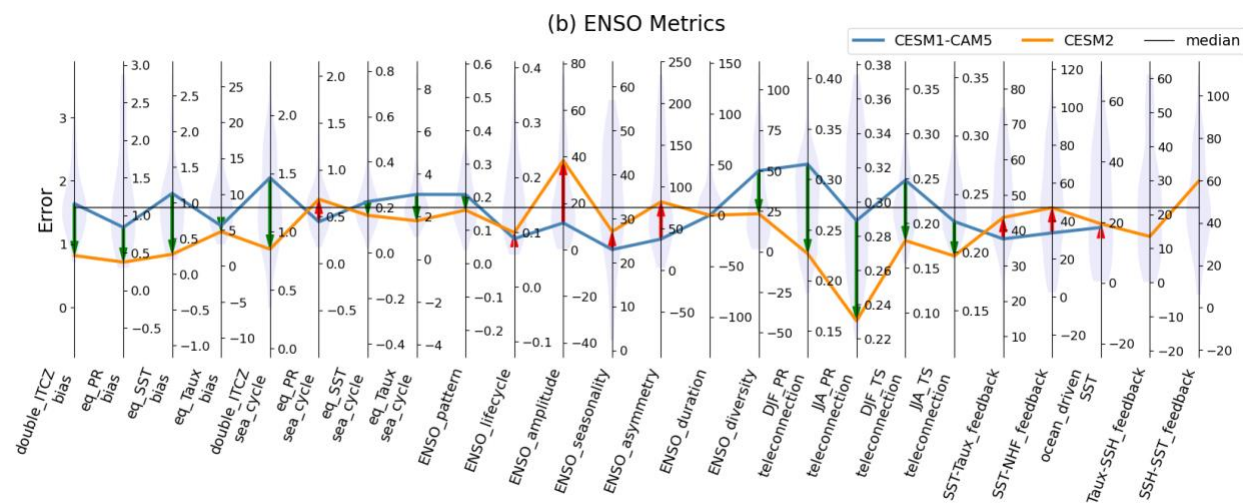

46

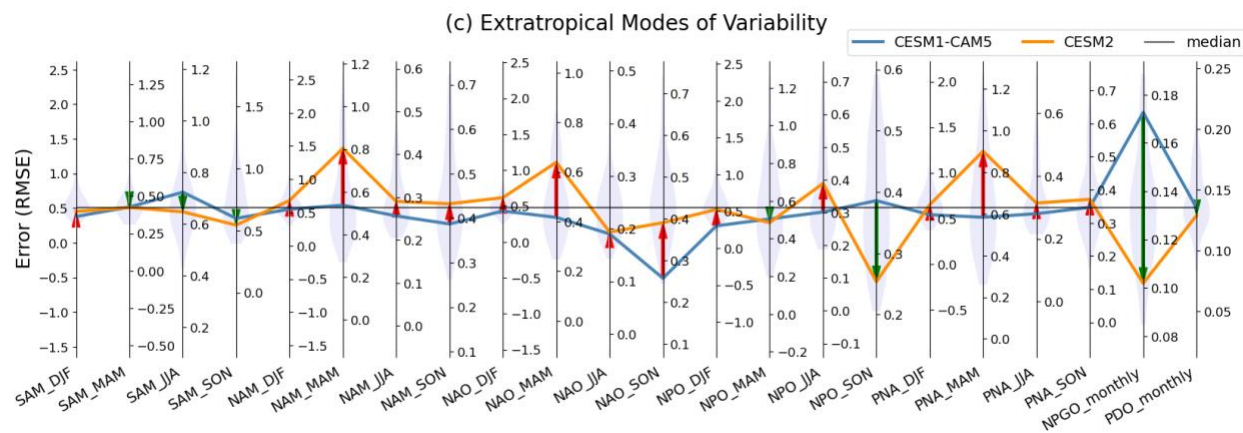

47

48 **Figure S2.** Same as Figure S1, but for CESM models (i.e., CESM1-CAM5 from CMIP5 and  
 49 CESM2 from CMIP6)

50

51

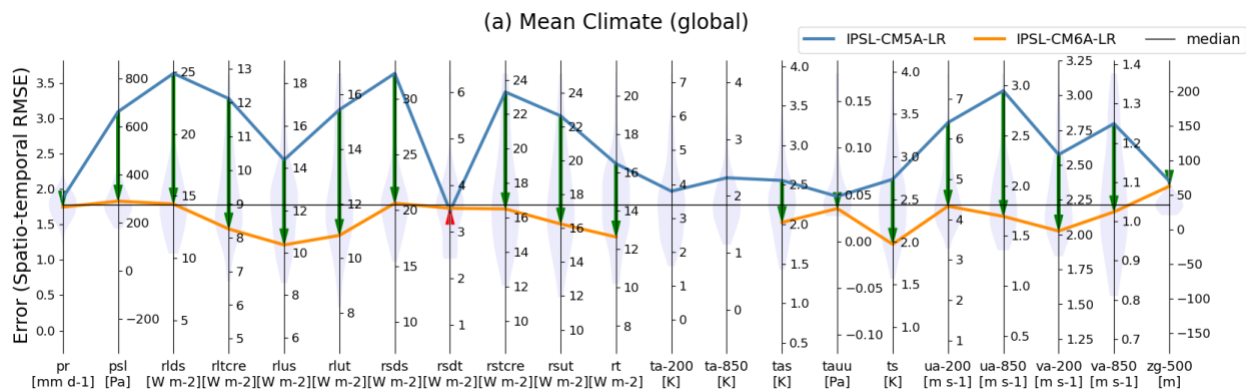

52

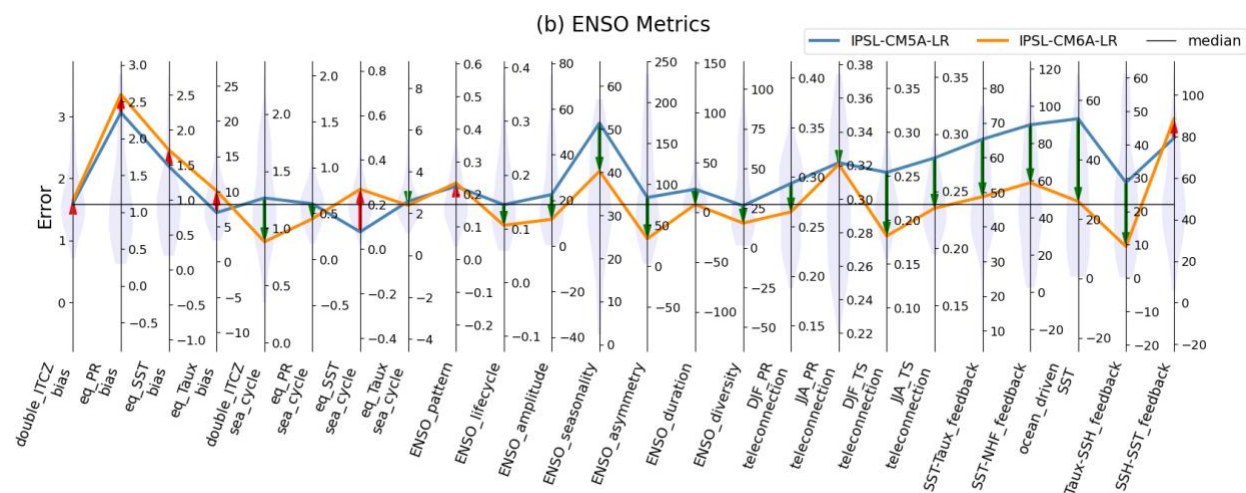

53

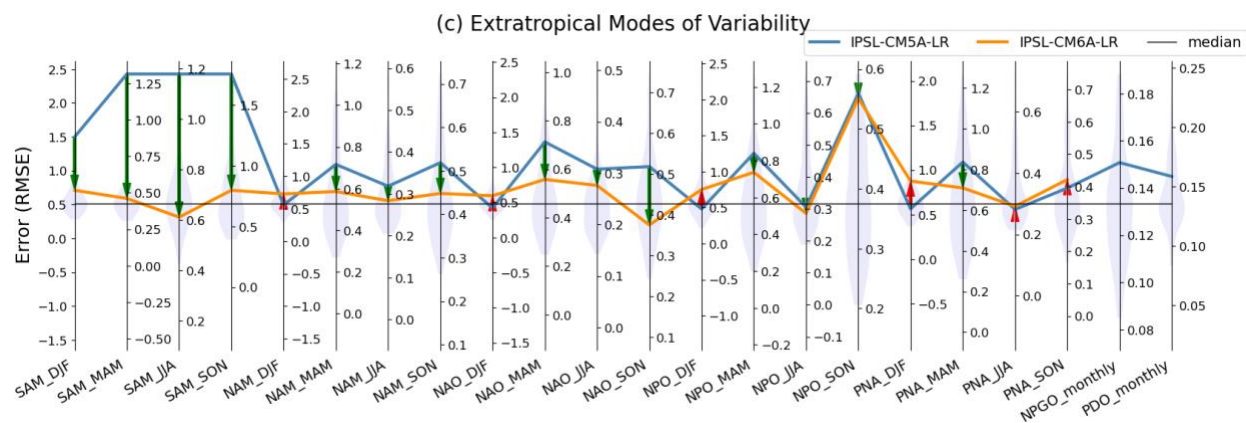

54 **Figure S3.** Same as Figure S1, but for IPSL models (i.e., IPSL-CM5A-LR from CMIP5 and  
 55 IPSL-CM6A-LR from CMIP6)
